# Supplementary material
Source: PubMed Central journal article supplement (PMC7869847)
Supplement: NIHMS1667010-supplement-Supplementary_Table.pdf [file NIHMS1667010-supplement-Supplementary_Table.pdf]

| <b>Supplemental Table 1: Characteristics of included and excluded participants</b> |              |               |               |         |
|------------------------------------------------------------------------------------|--------------|---------------|---------------|---------|
| Characteristic                                                                     |              | Included      | Excluded      | p-value |
| Sex (n, %)                                                                         | Male         | 576 (68%)     | 55 (54%)      | 0.005   |
| Age                                                                                | Years        | 43 (37–49)    | 40 (33–46)    | < 0.001 |
| Injection drug use (n, %)                                                          | Yes          | 664 (79%)     | 87 (85%)      | 0.152   |
| Crack use (n, %)                                                                   | Yes          | 659 (78%)     | 76 (75%)      | 0.449   |
| Opioid use (n, %)                                                                  | Yes          | 157 (19%)     | 24 (24%)      | 0.232   |
| Cocaine use (n, %)                                                                 | Yes          | 83 (10%)      | 13 (13%)      | 0.384   |
| Methamphetamine use (n, %)                                                         | Yes          | 138 (16%)     | 19 (19%)      | 0.573   |
| Alcohol use (n, %)                                                                 | Yes          | 446 (53%)     | 44 (43%)      | 0.074   |
| Cannabis use (n, %)                                                                | Yes          | 481 (57%)     | 44 (43%)      | 0.008   |
| Substances used                                                                    | Median (IQR) | 2 (2–3)       | 2 (1–3)       | 0.222   |
| Homelessness (n, %)                                                                | Yes          | 259 (31%)     | 41 (40%)      | 0.056   |
| HIV RNA VL (log <sub>10</sub> (copies/mL))                                         | Median (IQR) | 3.1 (1.7–4.5) | 4.0 (2.9–4.6) | 0.273   |
| CD4 cell count (cells per $\mu$ L)                                                 | Median (IQR) | 340 (210–500) | 448 (290–600) | 0.028   |
| ART exposure (days)                                                                | Median (IQR) | 180 (119–180) | 95 (72–162)   | 0.016   |
